# Supplementary material for: Association of Circulating Brain-Derived Neurotrophic Factor with Cognition among Adult Obese Population
Source: PubMed Central journal article supplement — J Obes Metab Syndr. 2021 Apr 21;30(2):163–72. doi: 10.7570/jomes20107 (PMC8277590; doi:10.7570/jomes20107), 2021-04-21
Supplement: jomes-30-2-163-supple.pdf [file jomes-30-2-163-supple.pdf]

**Supplementary Table 1.** Comparison of BDNF levels in the males and females between non-obese and obese groups

| Group           | BDNF (ng/mL)  | <i>P</i> |
|-----------------|---------------|----------|
| Non-obese group |               | 0.171    |
| Male (n=25)     | 82.16 ± 9.37  |          |
| Female (n=41)   | 85.56 ± 10.10 |          |
| Obese group     |               | 0.485    |
| Male (n=28)     | 62.00 ± 18.50 |          |
| Female (n=38)   | 65.11 ± 16.74 |          |

Values are presented as mean ± standard deviation. The mean difference between the groups were analyzed using chi-square test. A *P*-value <0.05 considered statistically significant.

BDNF, brain-derived neurotrophic factor.

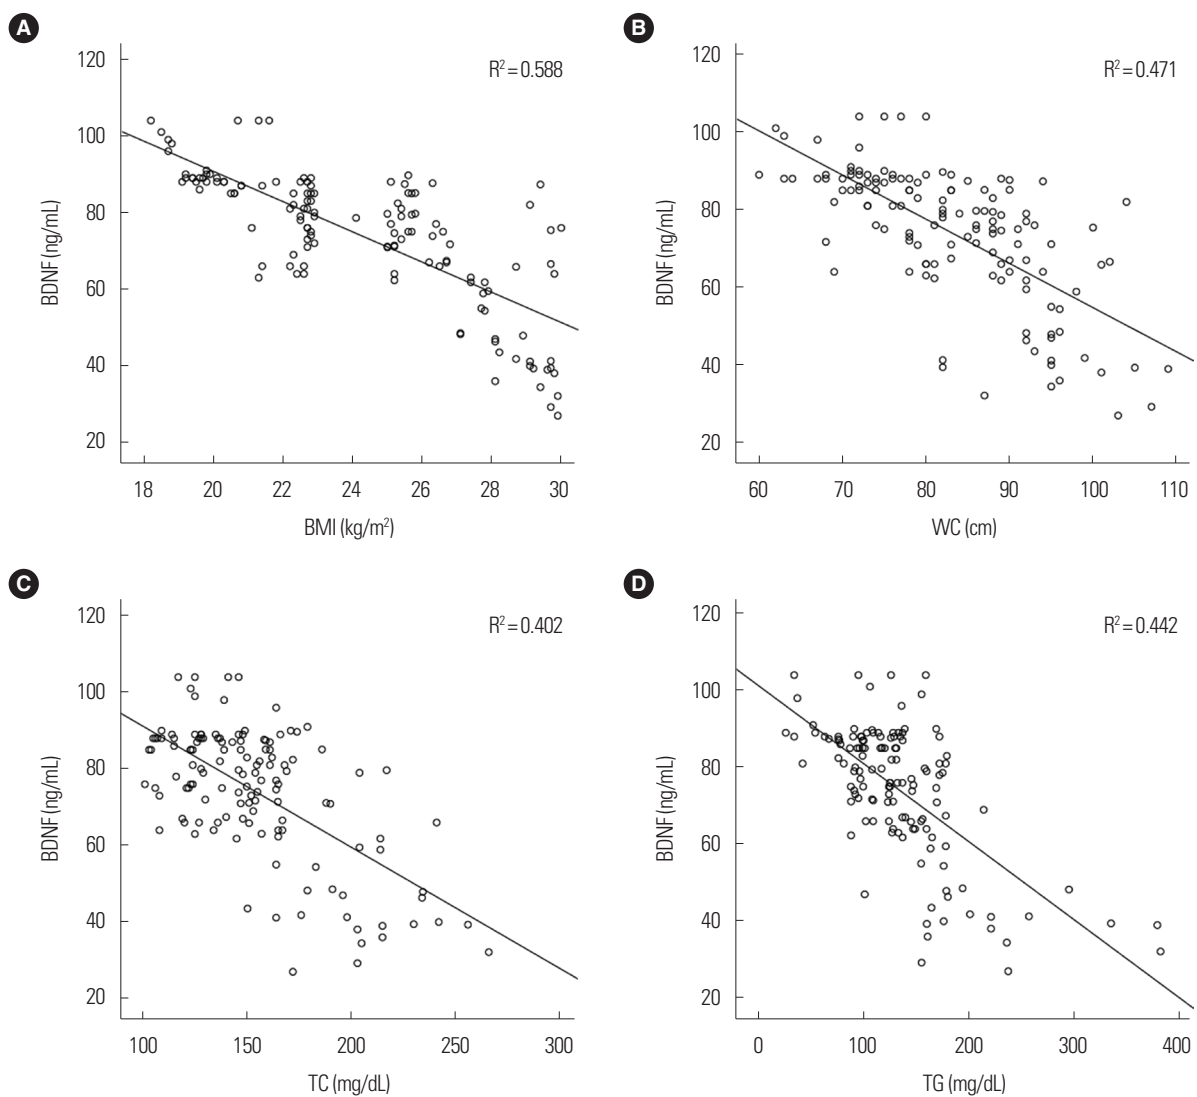

**Supplementary Figure 1.** Correlation of brain-derived neurotrophic factor (BDNF) with obesity indices. BMI, body mass index; WC, waist circumference; TC, total cholesterol; TG, triglycerides.

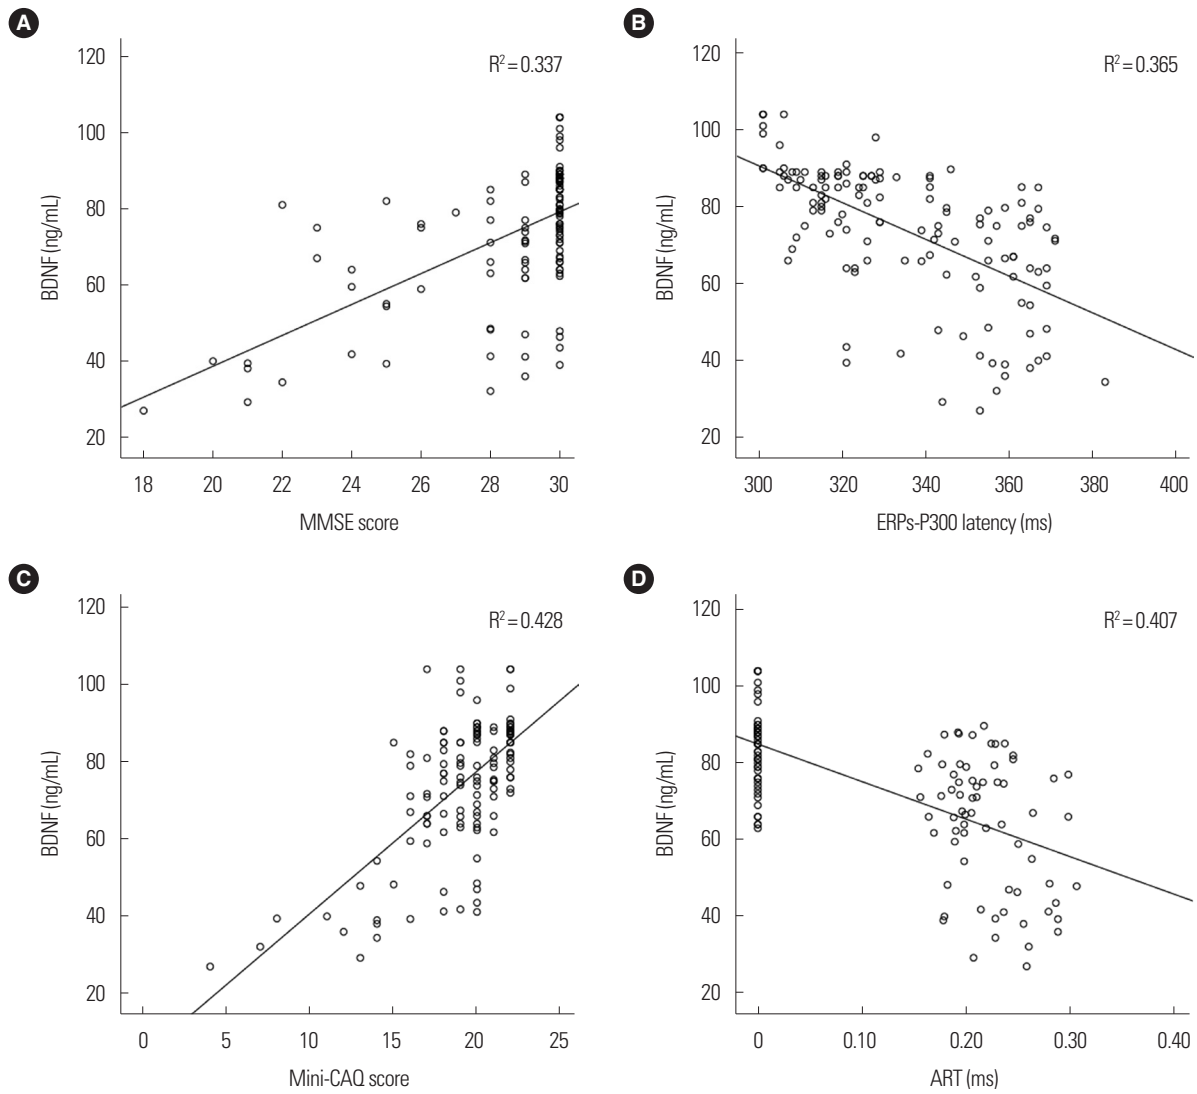

**Supplementary Figure 2.** Correlation of brain-derived neurotrophic factor (BDNF) with cognitive parameters. MMSE, mini-mental state examination; ERPs-P300, event-related potentials P300; Mini-CAQ, mini-cognitive assessment questionnaire; ART, auditory reaction time.
